# Supplementary material for: Structural tuning of polycaprolactone based thermadapt shape memory polymer
Source: Royal Society of Chemistry journal article supplement (doi:10.1039/c9py01891c), 2020-01-01
Supplement: c9py01891c1.pdf [file c9py01891c1.pdf]

## Electronic Supplementary Information

### Structural tuning of polycaprolactone based thermadappt shape memory polymer

Wusha Miao, WeiKe Zou\*, Yingwu Luo, Ning Zheng, Qiao Zhao, Tao Xie\*

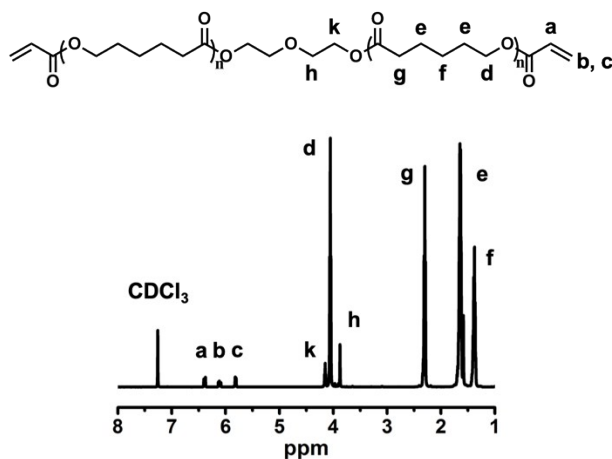

Figure S1. <sup>1</sup>H-NMR spectrum of PCLDA.

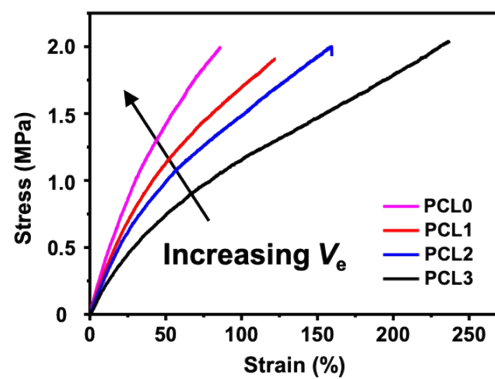

Figure S2. Stress strain curves of PCL0 to PCL3 networks at 60 °C.

Table S1. Gel content of all PCL samples.

| Sample          | PCL0  | PCL1  | PCL2  | PCL3  | PCL4  | PCL5  | PCL6  |
|-----------------|-------|-------|-------|-------|-------|-------|-------|
| Gel content (%) | 97.97 | 97.19 | 95.56 | 96.67 | 95.54 | 96.41 | 96.70 |

**Table S2.** Rubbery moduli and crosslinking density of **PCL0** to **PCL3** networks.

| Sample | E <sup>a</sup> (MPa) | Ve <sup>b</sup> (mol/m <sup>3</sup> ) |
|--------|----------------------|---------------------------------------|
| PCL0   | 3.77±0.36            | 453.7                                 |
| PCL1   | 3.17±0.08            | 381.5                                 |
| PCL2   | 2.59±0.17            | 311.7                                 |
| PCL3   | 2.23±0.06            | 268.4                                 |

<sup>a</sup>Obtained from tensile tests at 60 °C. <sup>b</sup>Calculated from the rubbery moduli using the equation [ $V_e = E/RT$ ], where E is the rubber modulus, T is the absolute temperature, and R is the universal gas constant.

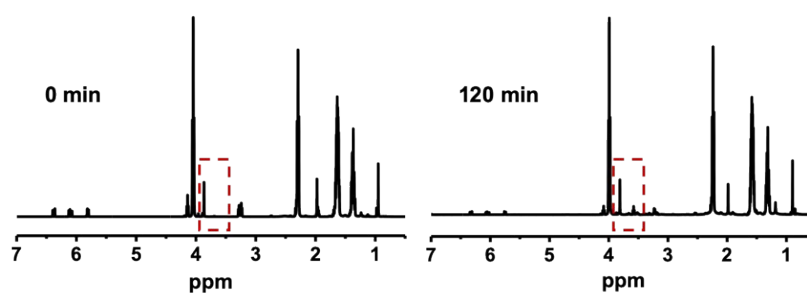

**Figure S3.** Full range <sup>1</sup>H-NMR spectra of the model compound experiments before and after thermal treatment at 100 °C in the presence of 4 wt% neutralized TBD.

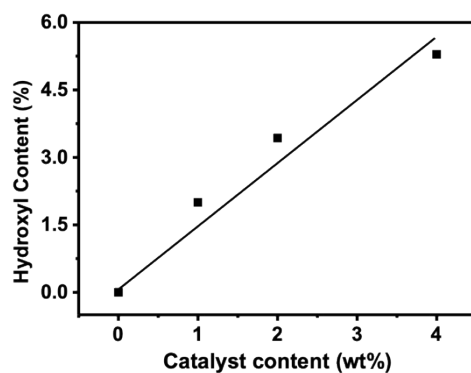

**Figure S4.** Correlation between produced hydroxyl contents and the amount of TBD catalyst.

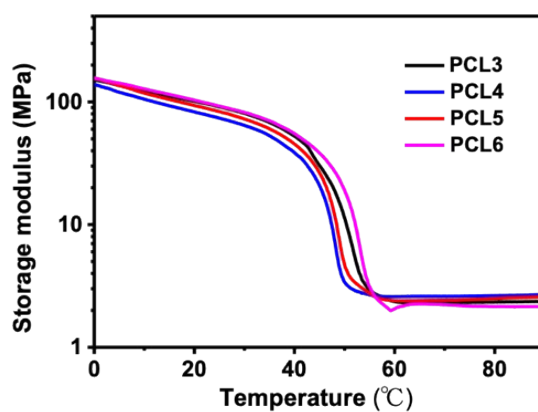

Figure S5. DMA curves for PCL3 to PCL6.

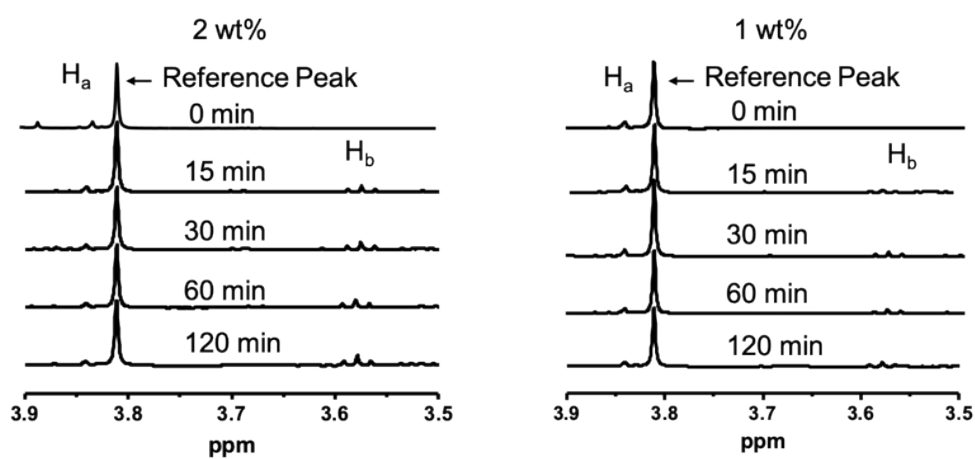

Figure S6.  $^1\text{H-NMR}$  spectra of the model compound experiments with different amounts of the neutralized TBD catalyst upon thermal annealing at  $100\text{ }^\circ\text{C}$ .
